# Supplementary material
Source: PubMed Central journal article supplement (PMC3485727)
Supplement: AEM.01459-12_zam999103758so1.pdf [file AEM.01459-12_zam999103758so1.pdf]

## SUPPLEMENTARY MATERIAL

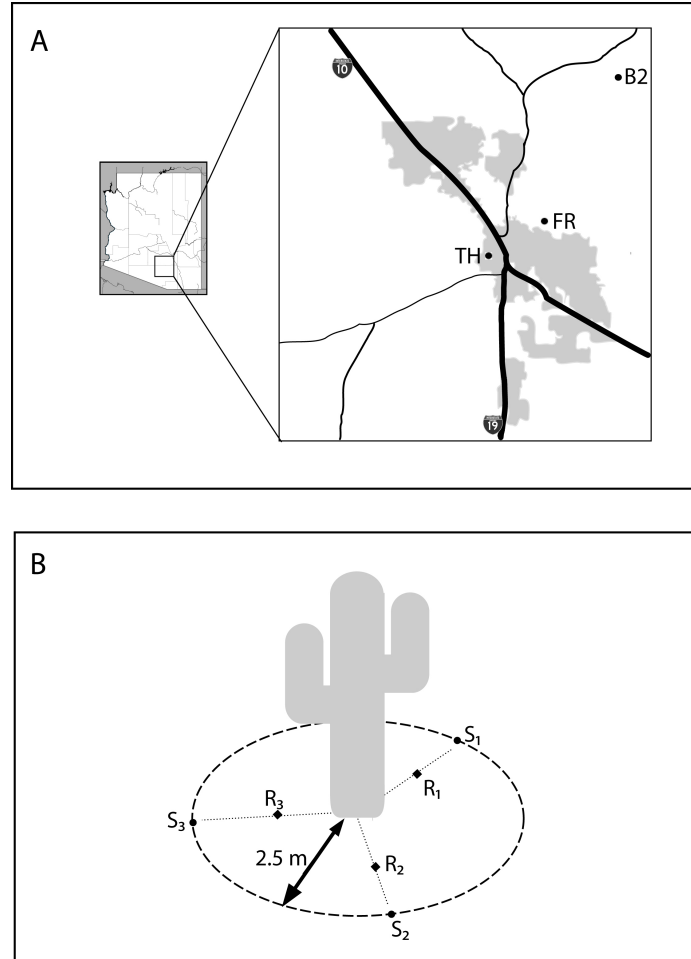

**Supplementary Figure 1:** Sample site locations (A) and biological replicates sampling scheme (B). A: The three Sonoran Desert samples sites were located in and around Tucson, AZ, USA. The Tumamoc Hill (TH) and Finger Rock (FR) samples were from native Sonoran Desert environments, while those from the Biosphere2 (B2) research facility represent an artificial desert ecosystem. B: Three soil (S<sub>1</sub>–S<sub>3</sub>) and three rhizosphere (R<sub>1</sub>–R<sub>3</sub>) samples were taken from around each of three cacti within each site approximately equidistantly sampled around the cactus. The rhizosphere samples were taken closer to the cactus to ensure we were sampling from the root of that particular cactus.

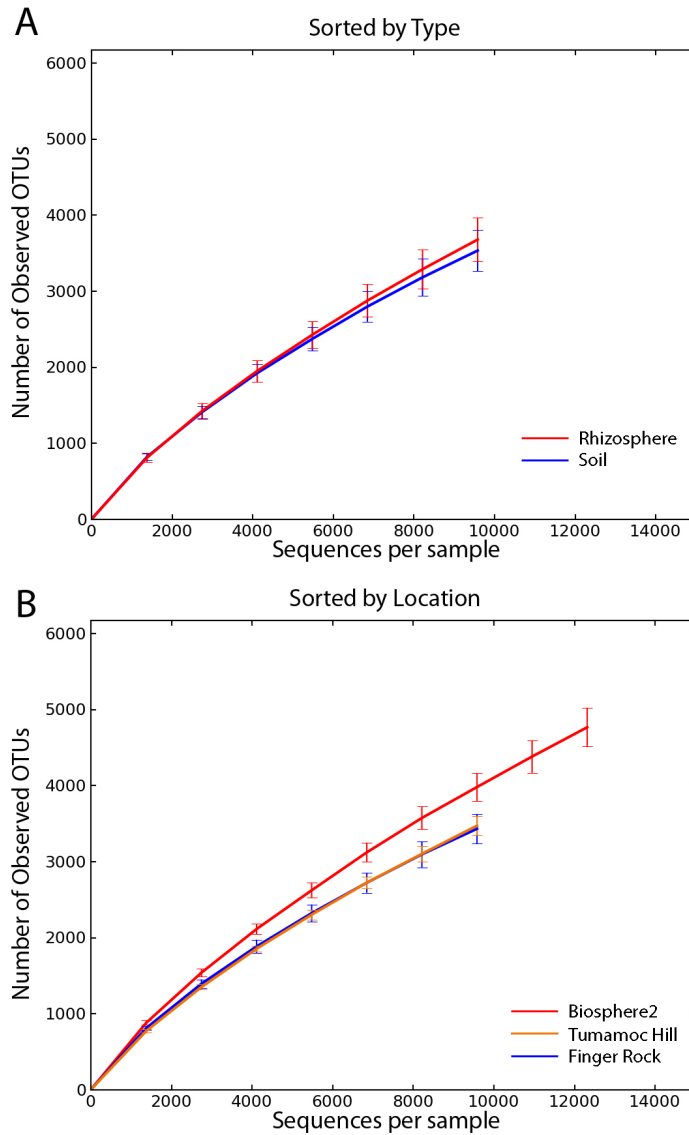

**Supplementary Figure 2:** Rarefaction curves of pooled samples showing relatively even sampling of rhizosphere and soil samples (A) and those pooled by location (B). The Biosphere2 samples were more thoroughly sampled than those of the other sites and contained a richer complement of OTUs.

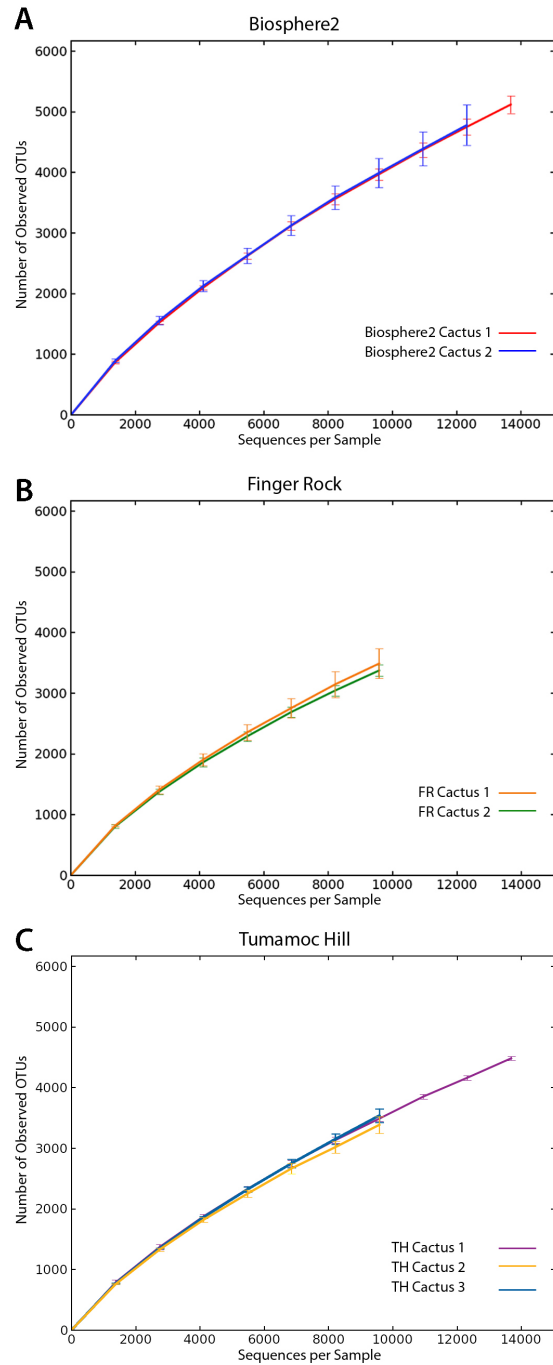

**Supplementary Figure 3:** Rarefaction curves of samples pooled by individual cactus (Rhizosphere and Soil samples combined) at the Biosphere2 (A), Finger Rock (B), and Tumamoc Hill (C) sites. These curves indicate even sampling efforts between the different cacti at each site.

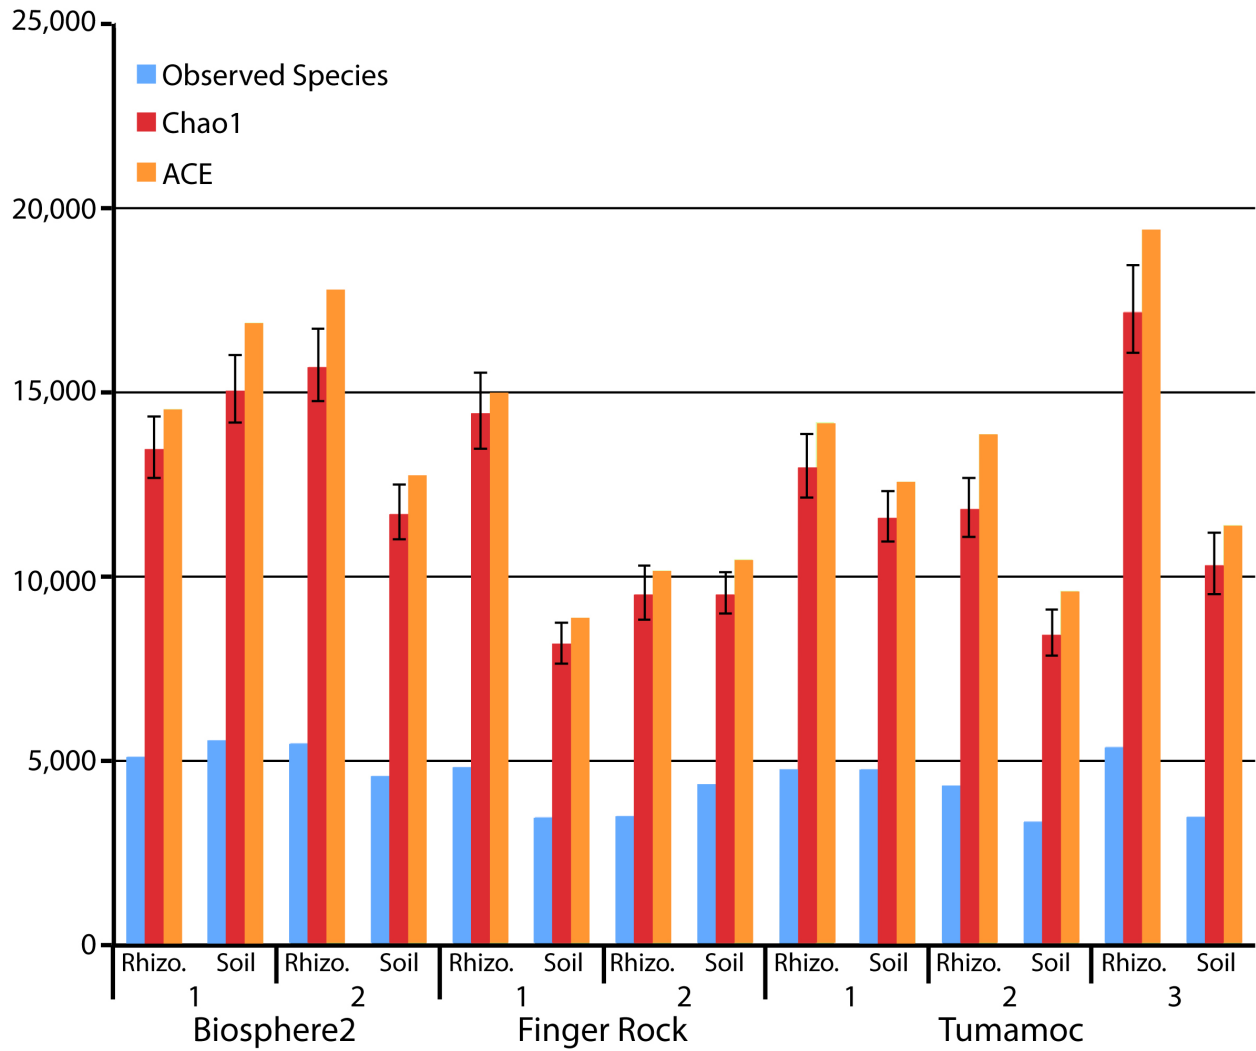

**Supplementary Figure 4:** The number of observed operational taxonomic units (OTUs) and alpha diversity estimates of pooled rhizosphere (Rhizo.) and soil samples at each of the cacti in this study. Chao1 estimates (red bars) are given with 95% confidence intervals. There is good agreement between Chao1 and ACE (orange bars) estimates at each pooled sample.

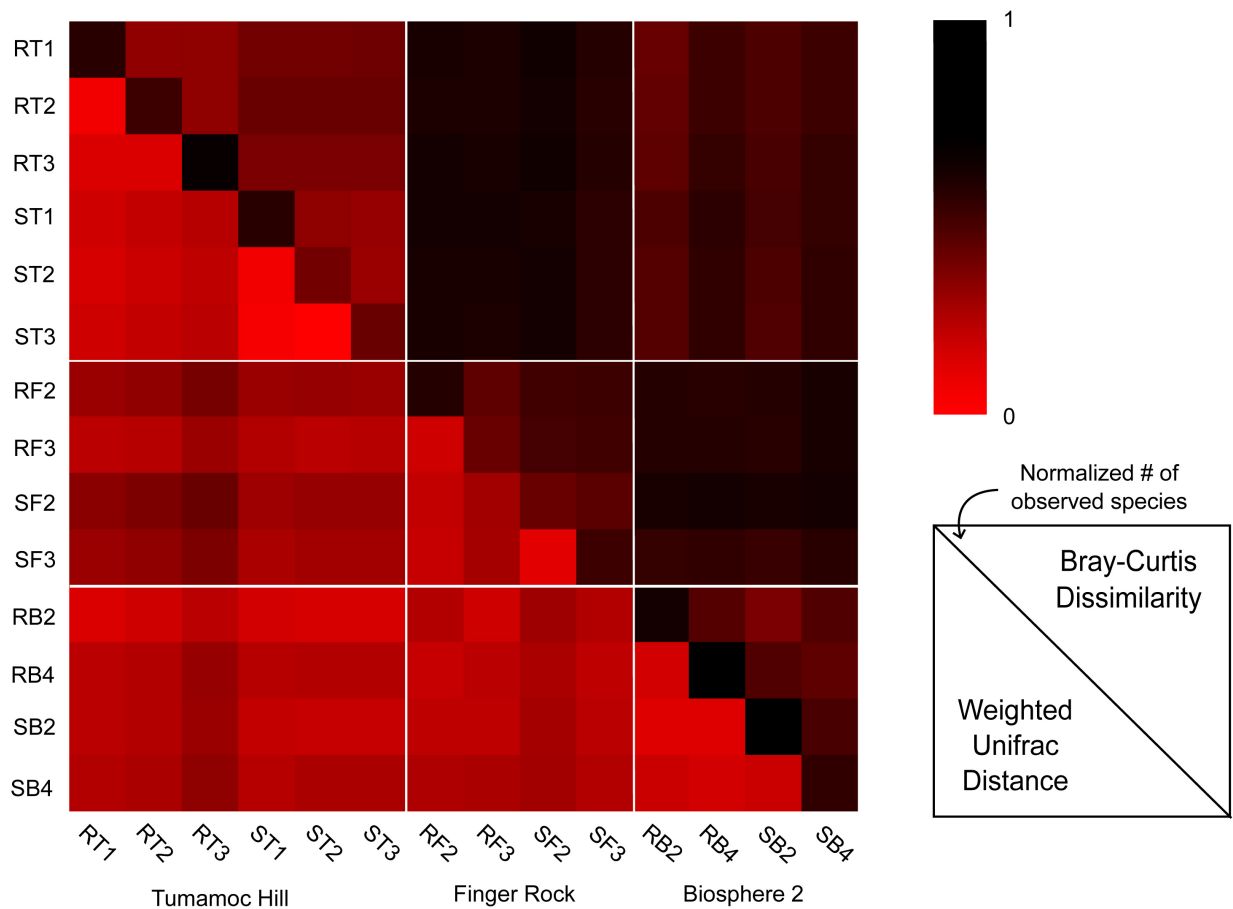

**Supplementary Figure 5:** Heatmap image of  $\beta$ -diversity distances between samples and the normalized number of OTUs (along the indicated diagonal). There is generally good agreement between the weighted UniFrac distances (lower, left portion) and Bray-Curtis dissimilarity (upper, right portion), although UniFrac distances are generally lower overall. Of note is the fact that distances are greater for both measures between areas with little taxonomic overlap, such as between Finger Rock and Tumamoc Hill samples.

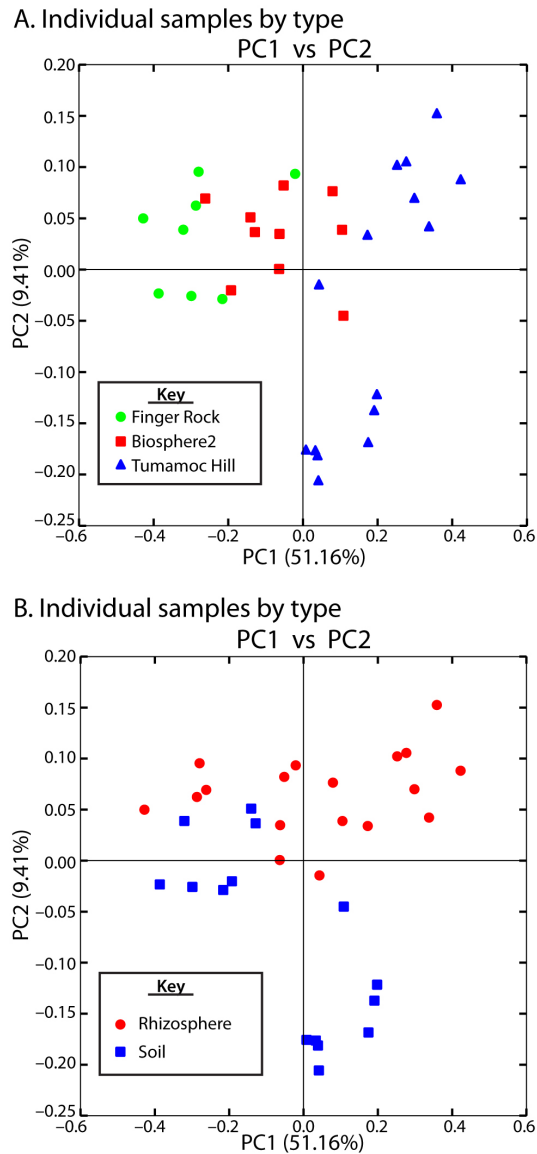

**Supplementary Figure 6:** Principal coordinate analysis of individual, un-pooled biological replicates organized by location (A) and soil sample type (B). Although these un-pooled samples do not cluster as strongly as those pooled by location or cactus (i.e. main text Figure 2), of note is the fact that un-pooled samples themselves are separated primarily by location along the axis of the first principal coordinate (PC1). For instance, those samples from Finger Rock all occurring to the left side of the x-axis. The second principal coordinate (PC2) then generally separates the samples based on soil or rhizosphere association, with some mixing of samples near the lower levels of the axis.

**Supplementary Table 1:** Adaptors, multiplex identification tags (MID), and reverse primer (1392R) for individual biological replicates. The sample names indicate, in order, soil or rhizosphere association (R, S), the location from which samples were taken (B = Biosphere2, F = Finger Rock, T = Tumamoc Hill), the cactus number, and finally replicate number. Below is the adaptor and forward (926F) primer.

| Sample name | A adaptor                  | Key  | MID     | 1392R primer    |
|-------------|----------------------------|------|---------|-----------------|
| RB11        | CCATCTCATCCCTGCGTGTCTCCGAC | TCAG | TAGCGC  | acgggcggtgtgtRc |
| RB12        | CCATCTCATCCCTGCGTGTCTCCGAC | TCAG | TAGTAC  | acgggcggtgtgtRc |
| RB13        | CCATCTCATCCCTGCGTGTCTCCGAC | TCAG | TATAGC  | acgggcggtgtgtRc |
| RB21        | CCATCTCATCCCTGCGTGTCTCCGAC | TCAG | TATGAC  | acgggcggtgtgtRc |
| RB22        | CCATCTCATCCCTGCGTGTCTCCGAC | TCAG | TCATAC  | acgggcggtgtgtRc |
| RB23        | CCATCTCATCCCTGCGTGTCTCCGAC | TCAG | ACACTGC | acgggcggtgtgtRc |
| RB41        | CCATCTCATCCCTGCGTGTCTCCGAC | TCAG | ACAGTAT | acgggcggtgtgtRc |
| RB42        | CCATCTCATCCCTGCGTGTCTCCGAC | TCAG | ACATAGT | acgggcggtgtgtRc |
| RB43        | CCATCTCATCCCTGCGTGTCTCCGAC | TCAG | ACATGAC | acgggcggtgtgtRc |
| RF11        | CCATCTCATCCCTGCGTGTCTCCGAC | TCAG | ATGTGT  | acgggcggtgtgtRc |
| RF12        | CCATCTCATCCCTGCGTGTCTCCGAC | TCAG | CACAGT  | acgggcggtgtgtRc |
| RF13        | CCATCTCATCCCTGCGTGTCTCCGAC | TCAG | CACGAT  | acgggcggtgtgtRc |
| RF21        | CCATCTCATCCCTGCGTGTCTCCGAC | TCAG | CACTAC  | acgggcggtgtgtRc |
| RF22        | CCATCTCATCCCTGCGTGTCTCCGAC | TCAG | CAGAGC  | acgggcggtgtgtRc |
| RF23        | CCATCTCATCCCTGCGTGTCTCCGAC | TCAG | CAGCAT  | acgggcggtgtgtRc |
| RF31        | CCATCTCATCCCTGCGTGTCTCCGAC | TCAG | CTGCGC  | acgggcggtgtgtRc |
| RF32        | CCATCTCATCCCTGCGTGTCTCCGAC | TCAG | CTGTAC  | acgggcggtgtgtRc |
| RF33        | CCATCTCATCCCTGCGTGTCTCCGAC | TCAG | TACTGC  | acgggcggtgtgtRc |
| RT11        | CCATCTCATCCCTGCGTGTCTCCGAC | TCAG | ACAGAC  | acgggcggtgtgtRc |
| RT12        | CCATCTCATCCCTGCGTGTCTCCGAC | TCAG | ACATGT  | acgggcggtgtgtRc |
| RT13        | CCATCTCATCCCTGCGTGTCTCCGAC | TCAG | ACGAGT  | acgggcggtgtgtRc |
| RT21        | CCATCTCATCCCTGCGTGTCTCCGAC | TCAG | ACGCAC  | acgggcggtgtgtRc |
| RT22        | CCATCTCATCCCTGCGTGTCTCCGAC | TCAG | ACGTAT  | acgggcggtgtgtRc |
| RT23        | CCATCTCATCCCTGCGTGTCTCCGAC | TCAG | ACGTGC  | acgggcggtgtgtRc |
| RT31        | CCATCTCATCCCTGCGTGTCTCCGAC | TCAG | ACTAGC  | acgggcggtgtgtRc |
| RT32        | CCATCTCATCCCTGCGTGTCTCCGAC | TCAG | ACTCGT  | acgggcggtgtgtRc |
| RT33        | CCATCTCATCCCTGCGTGTCTCCGAC | TCAG | ACTGAT  | acgggcggtgtgtRc |
| SB11        | CCATCTCATCCCTGCGTGTCTCCGAC | TCAG | TACAT   | acgggcggtgtgtRc |
| SB12        | CCATCTCATCCCTGCGTGTCTCCGAC | TCAG | TACGC   | acgggcggtgtgtRc |
| SB13        | CCATCTCATCCCTGCGTGTCTCCGAC | TCAG | TAGAC   | acgggcggtgtgtRc |
| SB21        | CCATCTCATCCCTGCGTGTCTCCGAC | TCAG | TATGT   | acgggcggtgtgtRc |
| SB22        | CCATCTCATCCCTGCGTGTCTCCGAC | TCAG | TCAGT   | acgggcggtgtgtRc |
| SB23        | CCATCTCATCCCTGCGTGTCTCCGAC | TCAG | TCGAT   | acgggcggtgtgtRc |

|      |                            |      |        |                 |
|------|----------------------------|------|--------|-----------------|
| SB41 | CCATCTCATCCCTGCGTGTCTCCGAC | TCAG | TCTAC  | acgggcggtgtgtRc |
| SB42 | CCATCTCATCCCTGCGTGTCTCCGAC | TCAG | ACACAT | acgggcggtgtgtRc |
| SB43 | CCATCTCATCCCTGCGTGTCTCCGAC | TCAG | ACACGC | acgggcggtgtgtRc |
| SF11 | CCATCTCATCCCTGCGTGTCTCCGAC | TCAG | CACGT  | acgggcggtgtgtRc |
| SF12 | CCATCTCATCCCTGCGTGTCTCCGAC | TCAG | CAGAT  | acgggcggtgtgtRc |
| SF21 | CCATCTCATCCCTGCGTGTCTCCGAC | TCAG | CGAGC  | acgggcggtgtgtRc |
| SF22 | CCATCTCATCCCTGCGTGTCTCCGAC | TCAG | CGCAT  | acgggcggtgtgtRc |
| SF23 | CCATCTCATCCCTGCGTGTCTCCGAC | TCAG | CGTAC  | acgggcggtgtgtRc |
| SF31 | CCATCTCATCCCTGCGTGTCTCCGAC | TCAG | CGTGT  | acgggcggtgtgtRc |
| SF32 | CCATCTCATCCCTGCGTGTCTCCGAC | TCAG | CTAGT  | acgggcggtgtgtRc |
| SF33 | CCATCTCATCCCTGCGTGTCTCCGAC | TCAG | CTGAC  | acgggcggtgtgtRc |
| ST11 | CCATCTCATCCCTGCGTGTCTCCGAC | TCAG | ACAGC  | acgggcggtgtgtRc |
| ST12 | CCATCTCATCCCTGCGTGTCTCCGAC | TCAG | ACGAC  | acgggcggtgtgtRc |
| ST13 | CCATCTCATCCCTGCGTGTCTCCGAC | TCAG | ACTAT  | acgggcggtgtgtRc |
| ST21 | CCATCTCATCCCTGCGTGTCTCCGAC | TCAG | AGAGT  | acgggcggtgtgtRc |
| ST22 | CCATCTCATCCCTGCGTGTCTCCGAC | TCAG | AGCAC  | acgggcggtgtgtRc |
| ST23 | CCATCTCATCCCTGCGTGTCTCCGAC | TCAG | AGTGC  | acgggcggtgtgtRc |
| ST31 | CCATCTCATCCCTGCGTGTCTCCGAC | TCAG | ATCAT  | acgggcggtgtgtRc |
| ST32 | CCATCTCATCCCTGCGTGTCTCCGAC | TCAG | ATCGC  | acgggcggtgtgtRc |
| ST33 | CCATCTCATCCCTGCGTGTCTCCGAC | TCAG | CACAC  | acgggcggtgtgtRc |

| <b>Forward primer</b>      |            |                          |                    |
|----------------------------|------------|--------------------------|--------------------|
| <b>B adapter</b>           | <b>Key</b> | <b>Template specific</b> | <b>Primer Name</b> |
| CCTATCCCCTGTGTGCCTTGGCAGTC | TCAG       | AAACTYAAAKGAATTGRCGG     | pyroLSSU926F       |



**Supplementary Table 2:** Physical and chemical soil characteristics of the soil immediately surrounding the cacti sampled in this study.

| Location    | Sample ID | Water content [%] | pH          | Electrical conductivity [ $\mu\text{S cm}^{-1}$ ] | Cation exchange capacity, CEC [meq/100g] | Total Carbon [(% dry soil)] | Total Nitrogen [(% dry soil)] | % Clay [ $< 2 \mu\text{m}$ ] | % Silt [2 - 50 $\mu\text{m}$ ] | % Sand [50 - 2000 $\mu\text{m}$ ] | % Stones [ $> 2\text{mm}$ by wt.] |
|-------------|-----------|-------------------|-------------|---------------------------------------------------|------------------------------------------|-----------------------------|-------------------------------|------------------------------|--------------------------------|-----------------------------------|-----------------------------------|
| Tumamoc     | 1         | 16.67 (0.15)      | 8.11 (0.08) | 259.9 (22.06)                                     | 6.67 (0.04)                              | 1.71 (0.01)                 | 0.070 (0.004)                 | 17.10 (0.81)                 | 27.20 (1.25)                   | 55.70 (2.03)                      | 44.45                             |
|             | 2         | 10.01 (1.87)      | 8.20 (0.17) | 234.8 (32.1)                                      | 6.61 (0.01)                              | 1.44 (0.23)                 | 0.044 (0.003)                 | 12.53 (0.20)                 | 26.77 (0.57)                   | 60.70 (0.75)                      | 48.50                             |
|             | 3         | 12.55 (4.64)      | 7.95 (0.10) | 319.5 (3.54)                                      | 6.66 (0.01)                              | 1.96 (0.06)                 | 0.158 (0.007)                 | 19.77 (0.12)                 | 31.17 (0.58)                   | 49.07 (0.49)                      | 59.06                             |
| Finger Rock | 1         | 7.09 (1.21)       | 5.09 (0.19) | 65.1 (0.64)                                       | 2.72 (0.33)                              | 0.49 (0.02)                 | 0.046 (0.009)                 | 7.44 (0.07)                  | 19.49 (0.17)                   | 73.07 (0.24)                      | 41.08                             |
|             | 2         | 7.34 (0.08)       | 6.03 (0.13) | 139.0 (4.95)                                      | 5.30 (0.69)                              | 0.61 (0.05)                 | 0.054 (0.001)                 | 6.84 (0.06)                  | 18.96 (0.15)                   | 74.20 (0.15)                      | 30.64                             |
| Biosphere2  | 1         | 11.11 (0.30)      | 7.99 (0.10) | 315.5 (3.54)                                      | 6.65 (0.01)                              | 1.35 (0.05)                 | 0.085 (0.014)                 | 14.37 (0.43)                 | 28.97 (0.97)                   | 56.67 (1.39)                      | 56.24                             |
|             | 2         | 4.47 (0.78)       | 8.62 (0.11) | 119.8 (8.06)                                      | 2.23 (0.34)                              | 0.40 (0.01)                 | 0.018 (0.001)                 | 4.56 (0.31)                  | 7.58 (0.07)                    | 87.87 (0.38)                      | 1.91                              |

Table S2. Mean values of geochemical parameters of soils at each collection site. Standard deviations are given in parentheses.
